# Supplementary material
Source: PubMed Central journal article supplement (PMC7709799)
Supplement: NIHMS1644704-supplement-Supplemental_figures.pdf [file NIHMS1644704-supplement-Supplemental_figures.pdf]

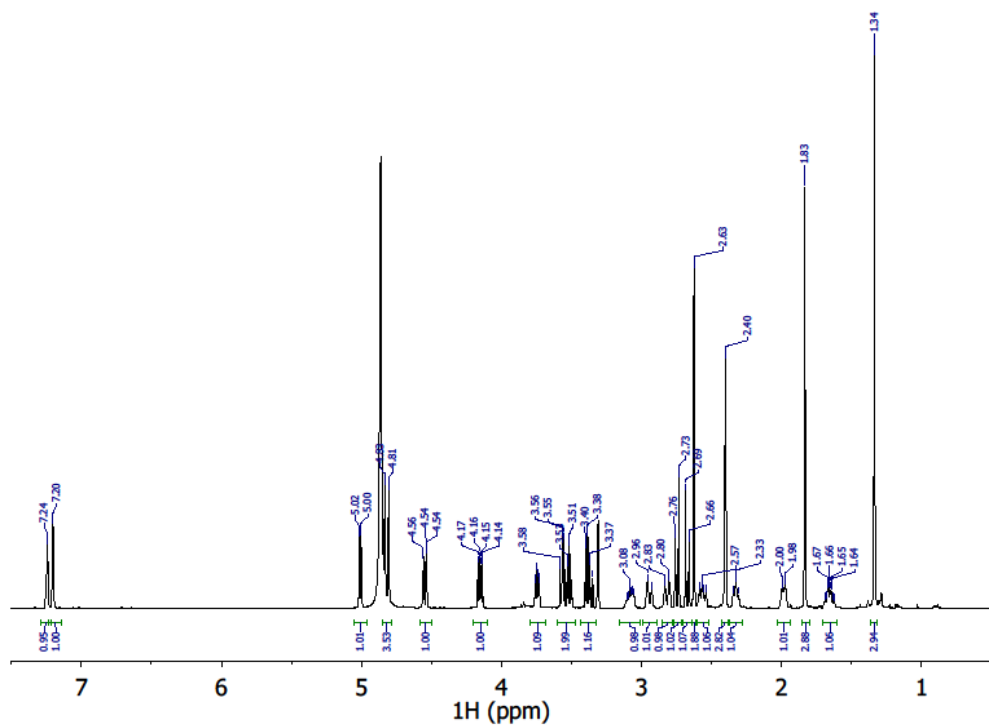

**Figure S1.**  $^1\text{H}$  NMR (600 MHz,  $\text{CD}_3\text{OD}$ ) spectrum of compound **1**.

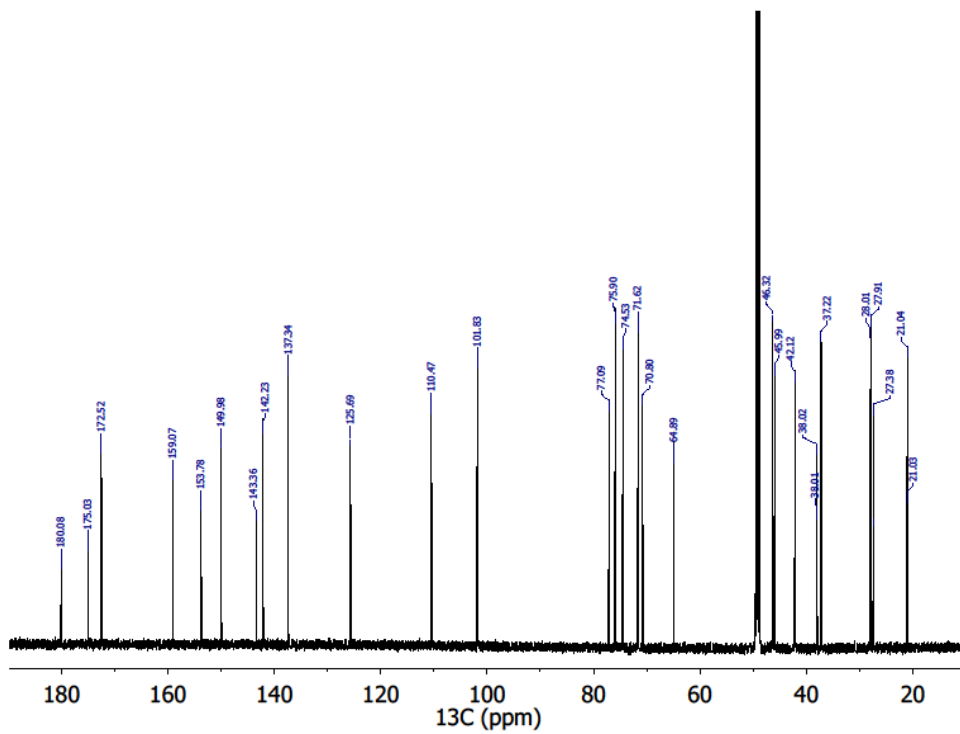

**Figure S2.**  $^{13}\text{C}$  NMR (150 MHz,  $\text{CD}_3\text{OD}$ ) spectrum of compound **1**.

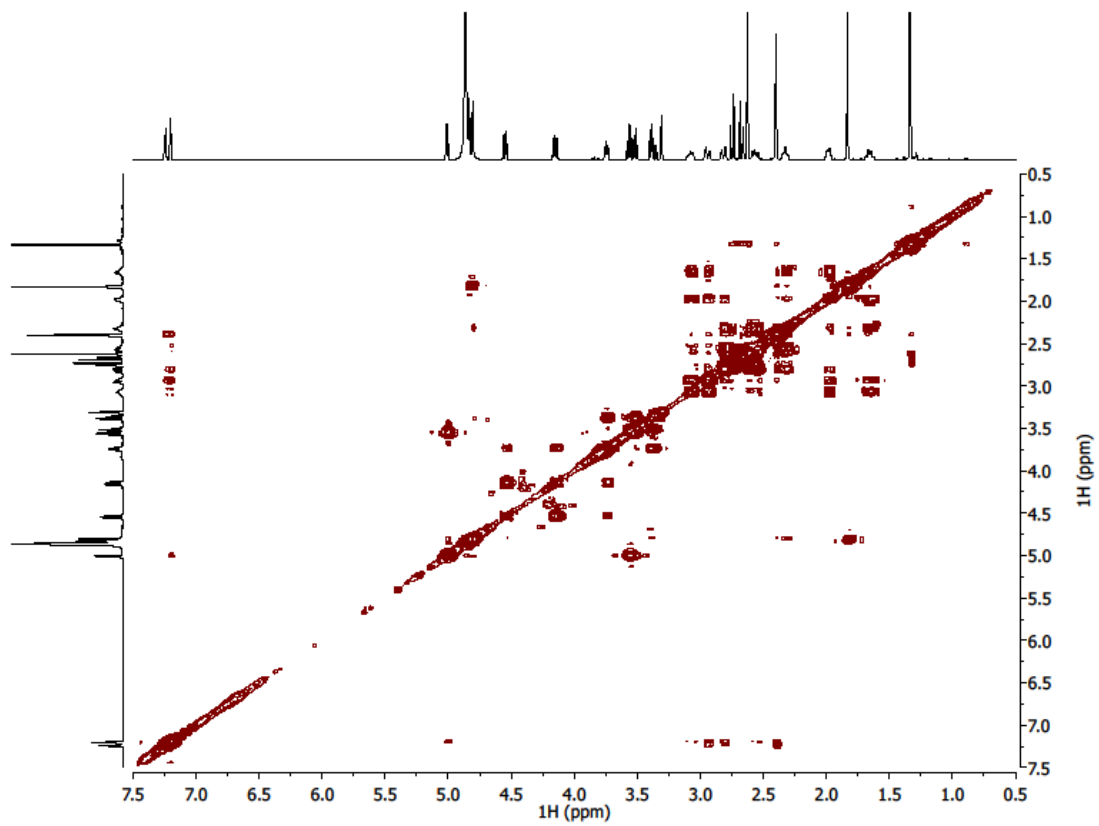

**Figure S3.** COSY (600 MHz,  $\text{CD}_3\text{OD}$ ) spectrum of compound **1**.

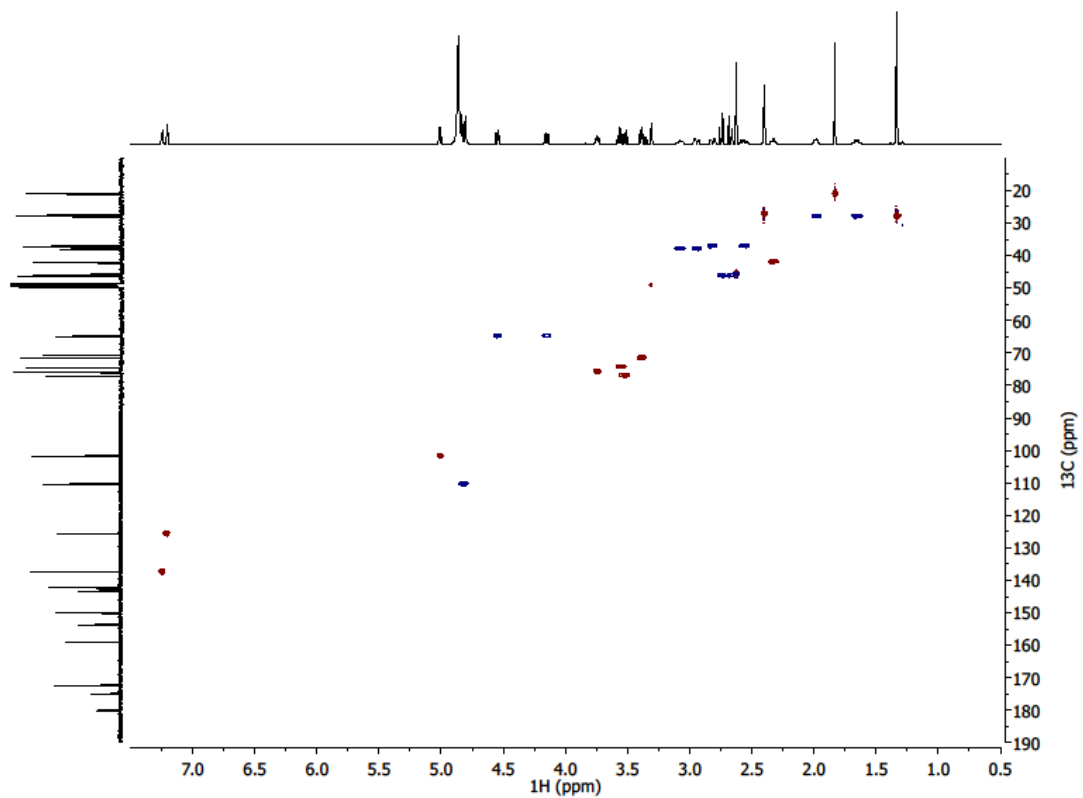

**Figure S4.** HSQC (600 MHz, 150 MHz,  $\text{CD}_3\text{OD}$ ) spectrum of compound **1**.

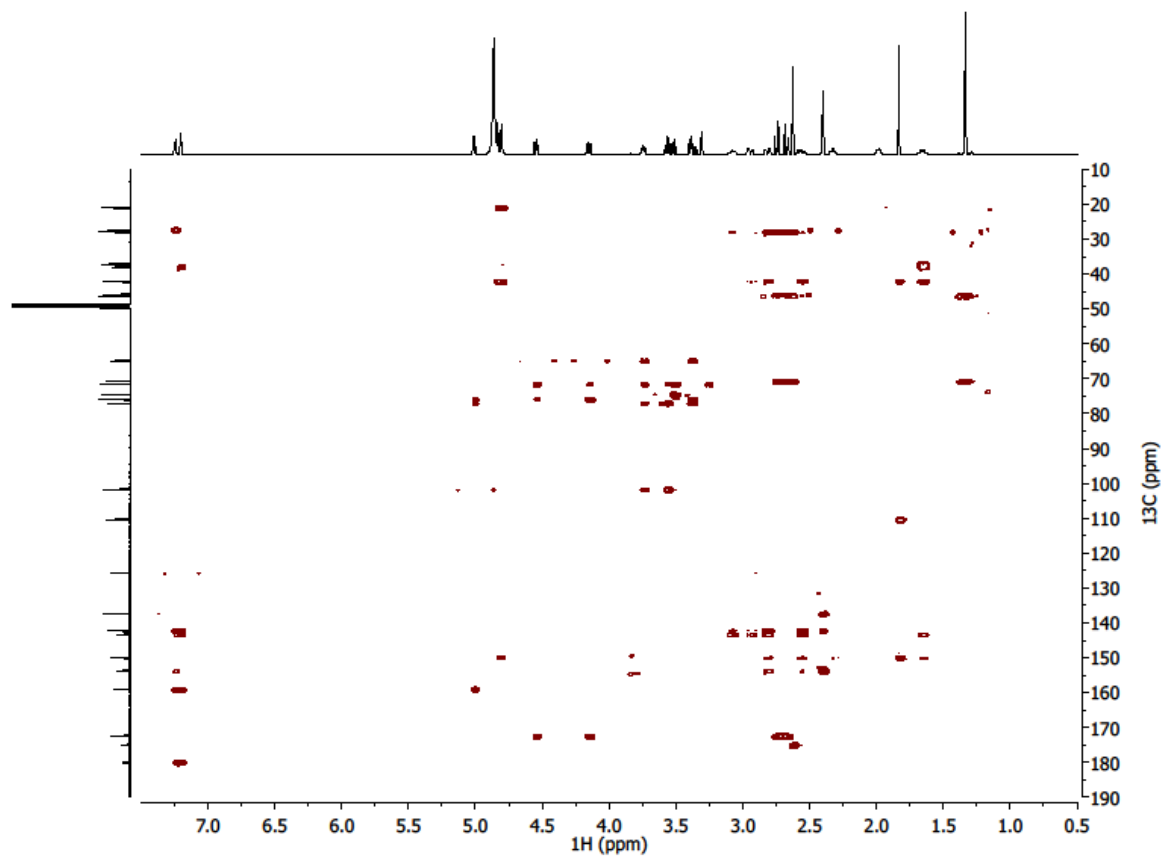

**Figure S5.** HMBC (600 MHz, 150 MHz,  $\text{CD}_3\text{OD}$ ) spectrum of compound **1**.

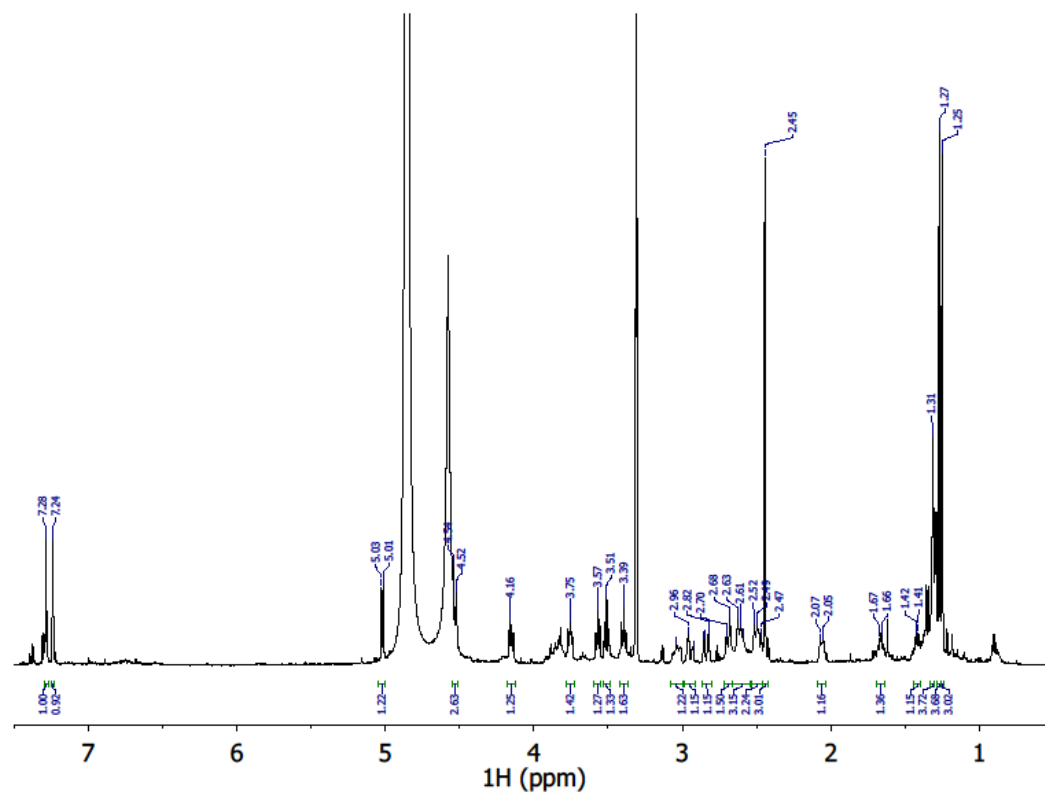

**Figure S6.**  $^1\text{H}$  NMR (600 MHz,  $\text{CD}_3\text{OD}$ ) spectrum of compound 2.

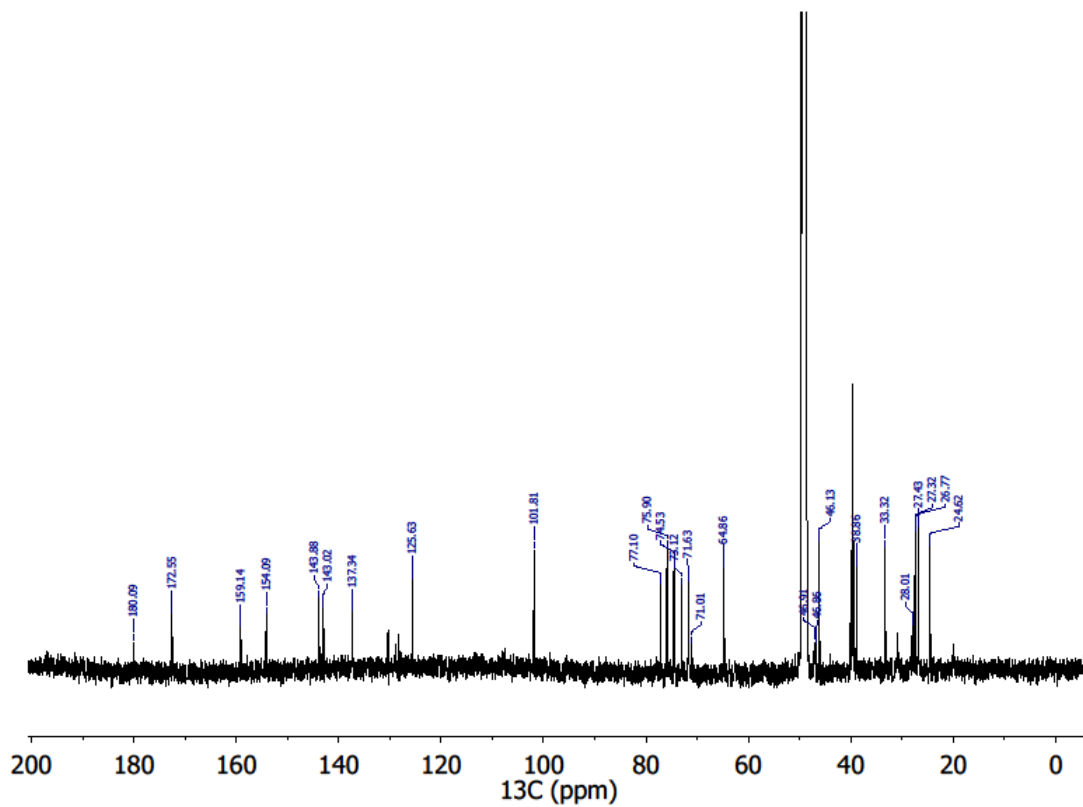

**Figure S7.**  $^{13}\text{C}$  NMR (150 MHz,  $\text{CD}_3\text{OD}$ ) spectrum of compound 2.

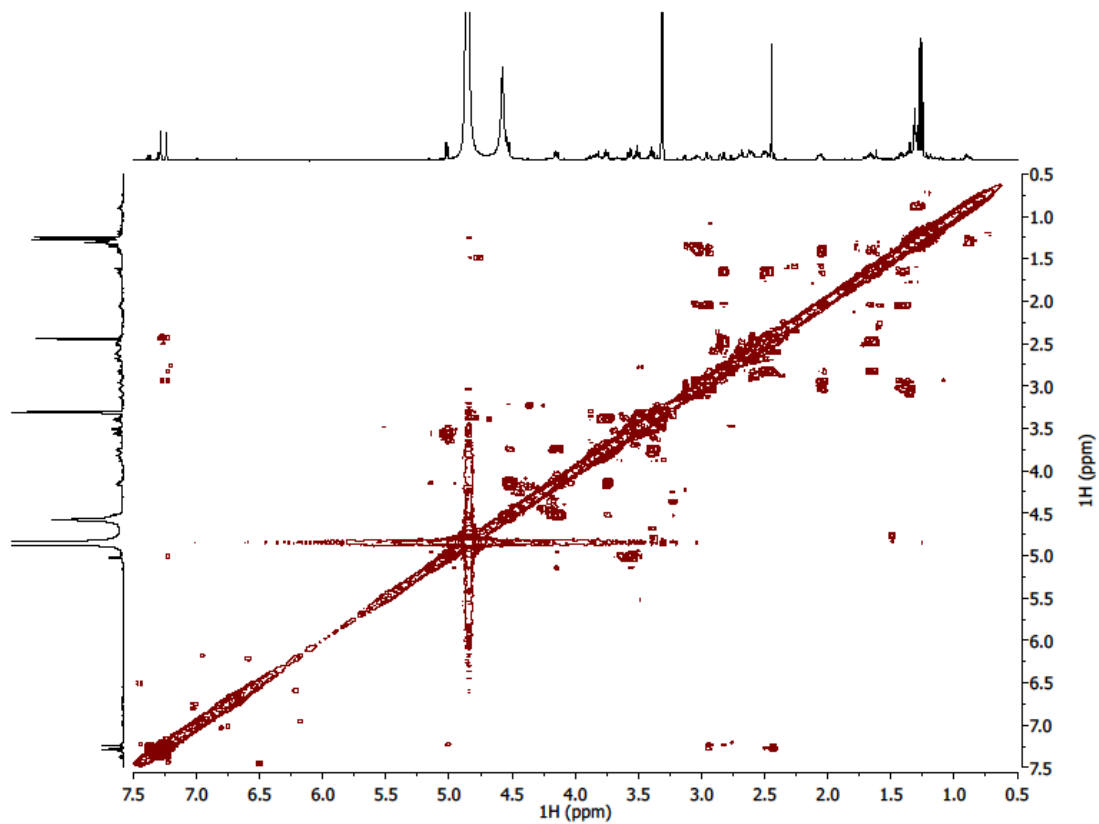

**Figure S8.** COSY (600 MHz,  $\text{CD}_3\text{OD}$ ) spectrum of compound 2.

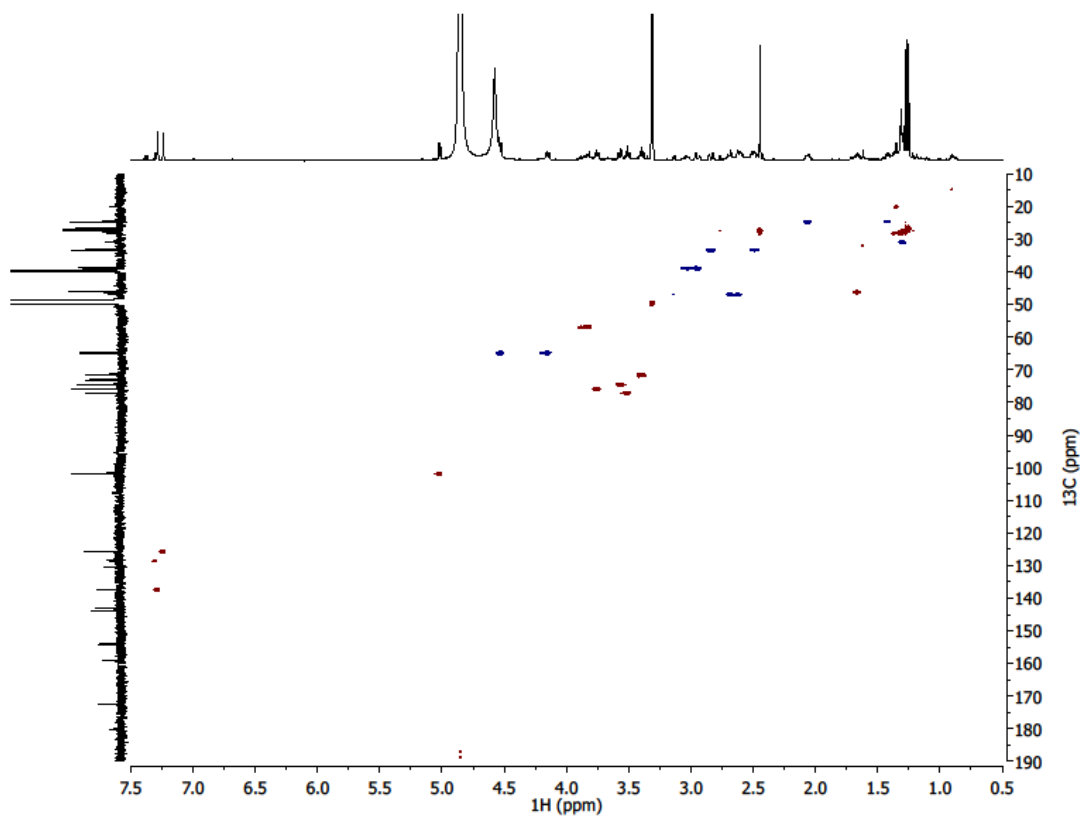

**Figure S9.** HSQC (600 MHz, 150 MHz,  $\text{CD}_3\text{OD}$ ) spectrum of compound **2**.



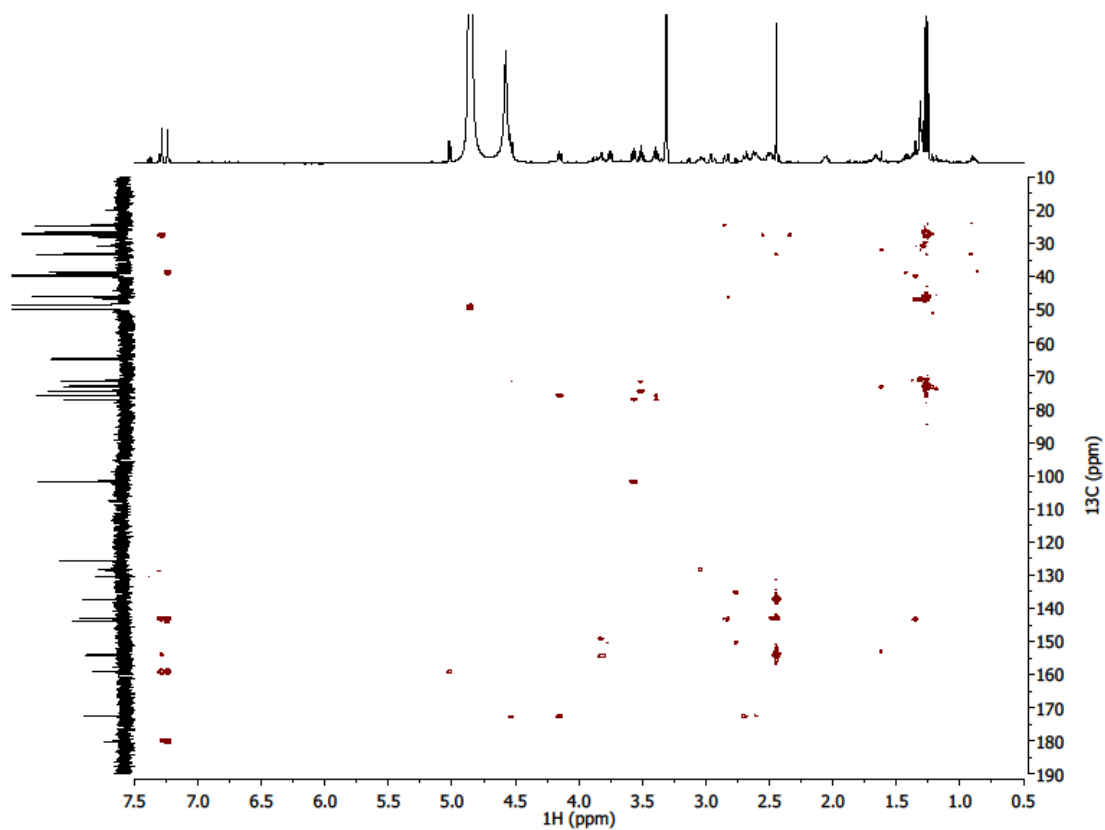

**Figure S10.** HMBC (600 MHz, 150 MHz,  $\text{CD}_3\text{OD}$ ) spectrum of compound **2**.
